# Supplementary material for: Caspar specifies primordial germ cell count and identity in Drosophila melanogaster
Source: eLife journal article supplement (doi:10.7554/elife.98584), 2024-06-21
Supplement: fig1-data1 [file elife-98584-fig1-data1-v1.pdf]

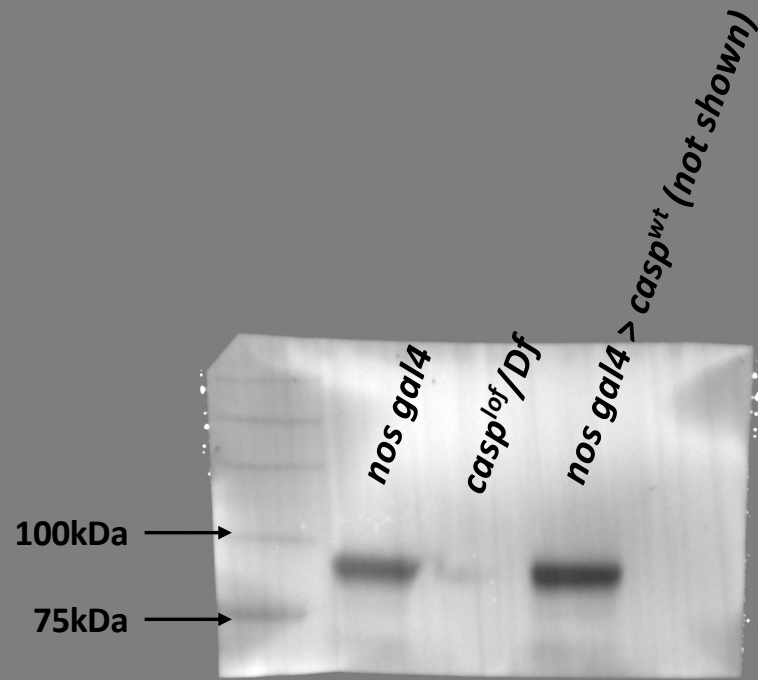

*Immunoblot: Rabbit anti Caspar  
(1:10,000)*

**Figure 1, Source Data 1.**  
**Original membranes**  
**corresponding to Figure**  
**1, panel E.** Blot was  
probed with rabbit anti-  
Caspar antibody. Biorad  
Precision Plus Protein  
standards (Dual Colour)  
was used as molecular  
weight marker

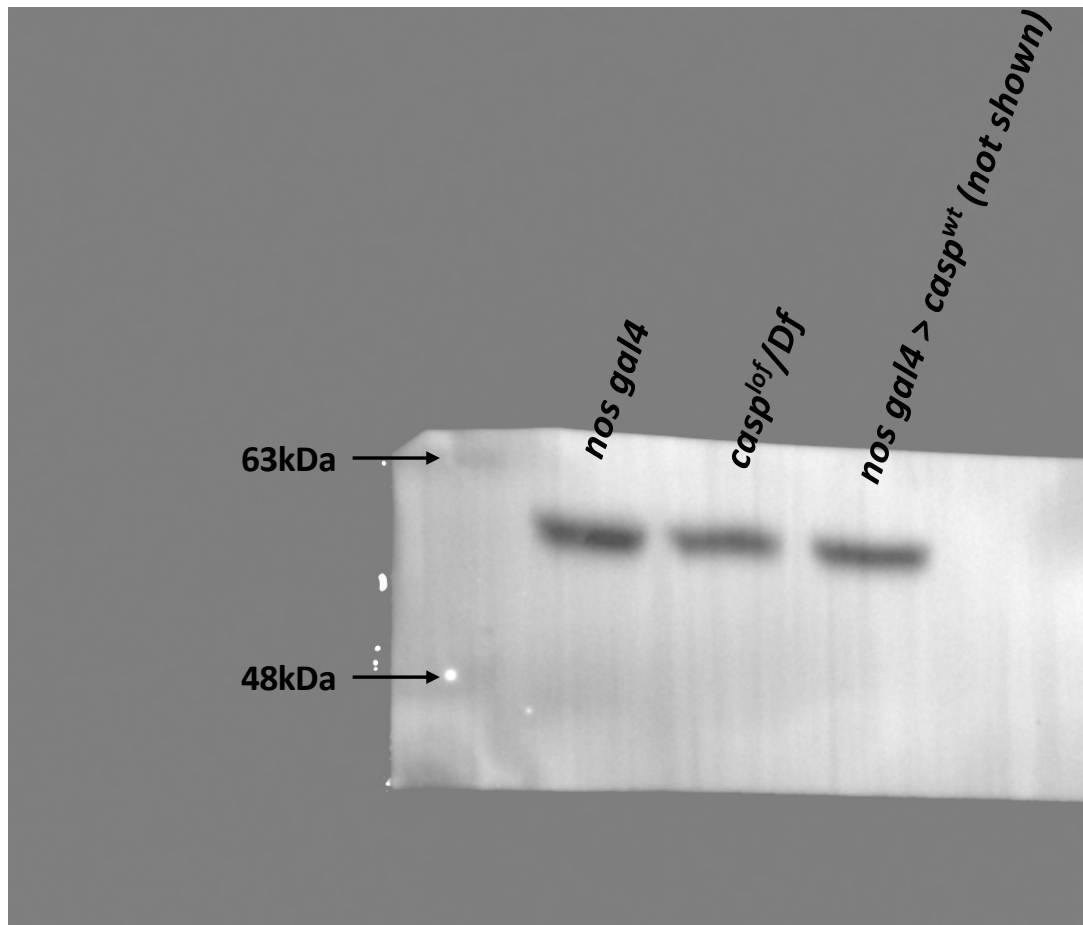

***Immunoblot: Mouse anti Tubulin  
(1:10,000)***

**Figure 1, Source Data 1.**  
**Original membranes**  
**corresponding to Figure**  
**1, panel E.** Blot was  
probed with mouse  
anti-Tubulin antibody.  
Biorad Precision Plus  
Protein standards (Dual  
Colour) was used as  
molecular weight  
marker
