# Supplementary material for: Caspar specifies primordial germ cell count and identity in Drosophila melanogaster
Source: eLife journal article supplement (doi:10.7554/elife.98584), 2024-06-21
Supplement: fig3-data1 [file elife-98584-fig3-data1-v1.pdf]

**Figure 3, Source Data 1.**  
**Original membranes**  
**corresponding to Figure**  
**3, panel G.** Blot was  
probed with rabbit anti-  
Caspar antibody. Biorad  
Precision Plus Protein  
standards (Dual Colour)  
was used as molecular  
weight marker

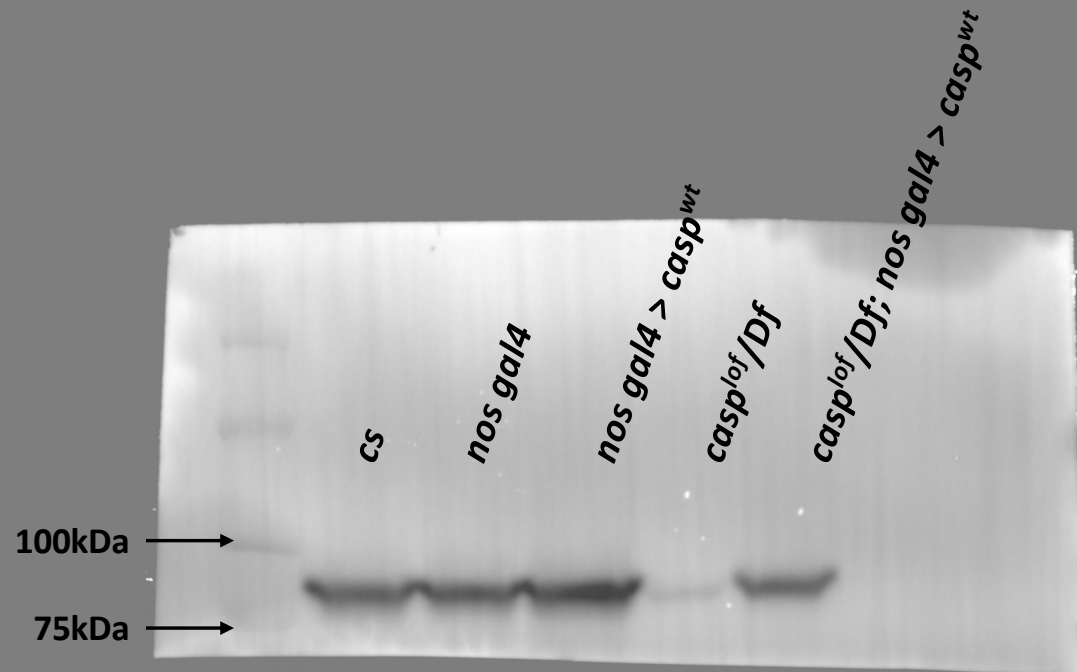

*Immunoblot: Rabbit anti Caspar  
(1:10,000)*

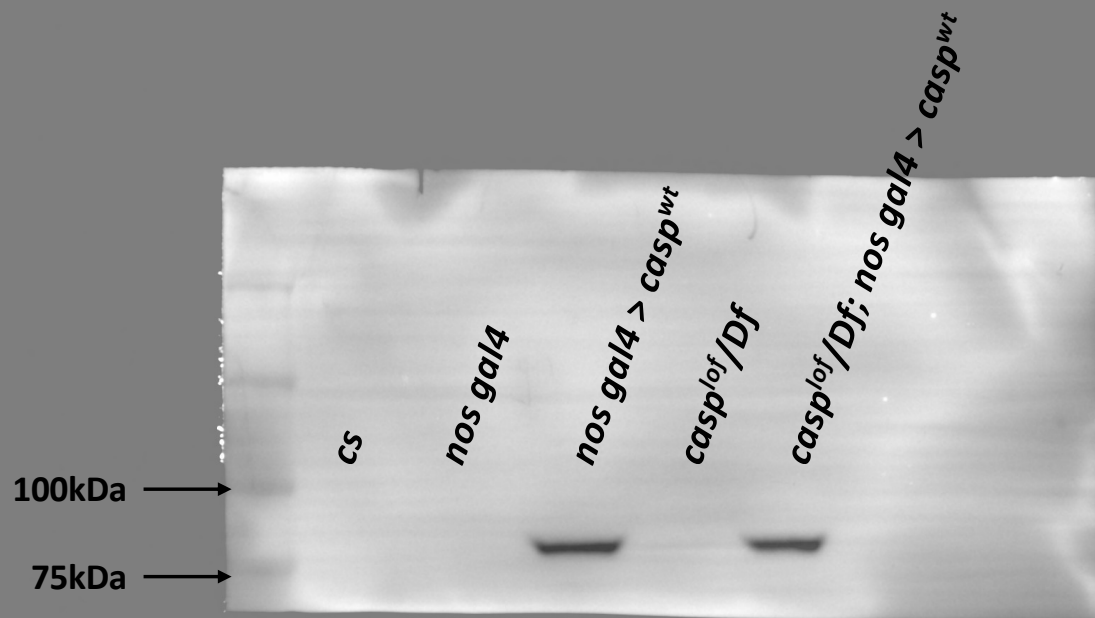

*Immunoblot: Rabbit anti HA  
(1:2000)*

**Figure 3, Source Data 1.**  
**Original membranes**  
**corresponding to Figure**  
**3, panel G.** Blot was  
probed with rabbit anti-  
HA antibody. Biorad  
Precision Plus Protein  
standards (Dual Colour)  
was used as molecular  
weight marker

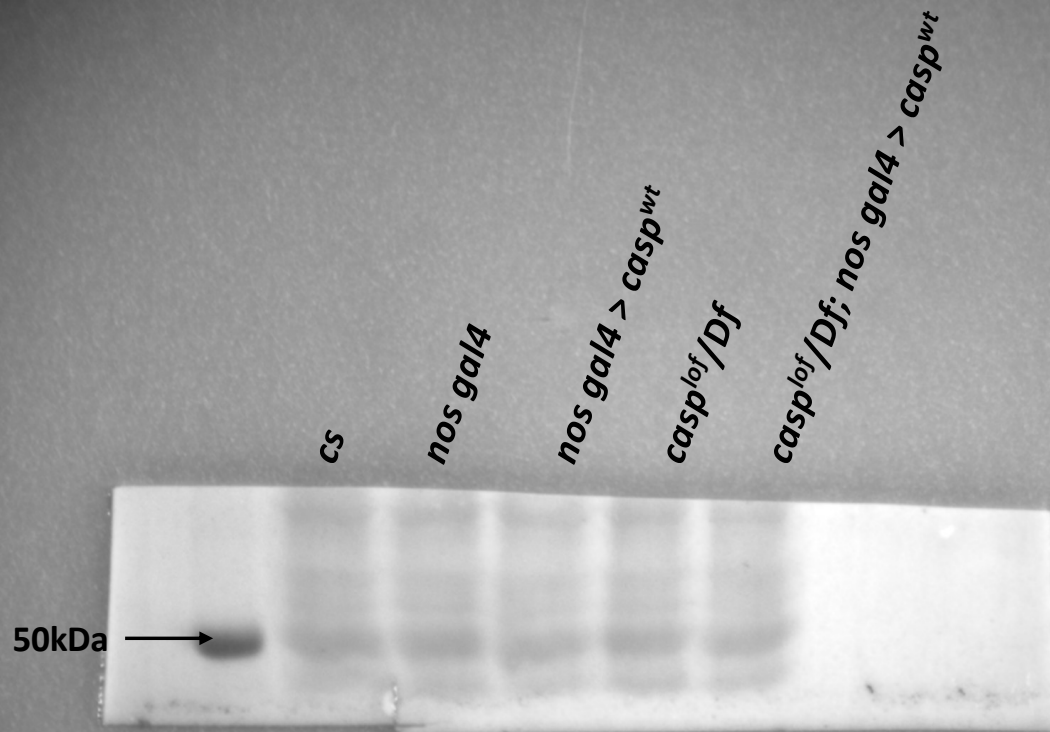

PONCEAU-S

**Figure 3, Source Data 1.** Original membranes corresponding to Figure 3, panel G. Blot represents Ponceau staining to show equal protein loading. Biorad Precision Plus Protein standards (Dual Colour) was used as molecular weight marker
