# Supplementary material for: Caspar specifies primordial germ cell count and identity in Drosophila melanogaster
Source: eLife journal article supplement (doi:10.7554/elife.98584), 2024-06-21
Supplement: fig4-data1 [file elife-98584-fig4-data1-v1.pdf]

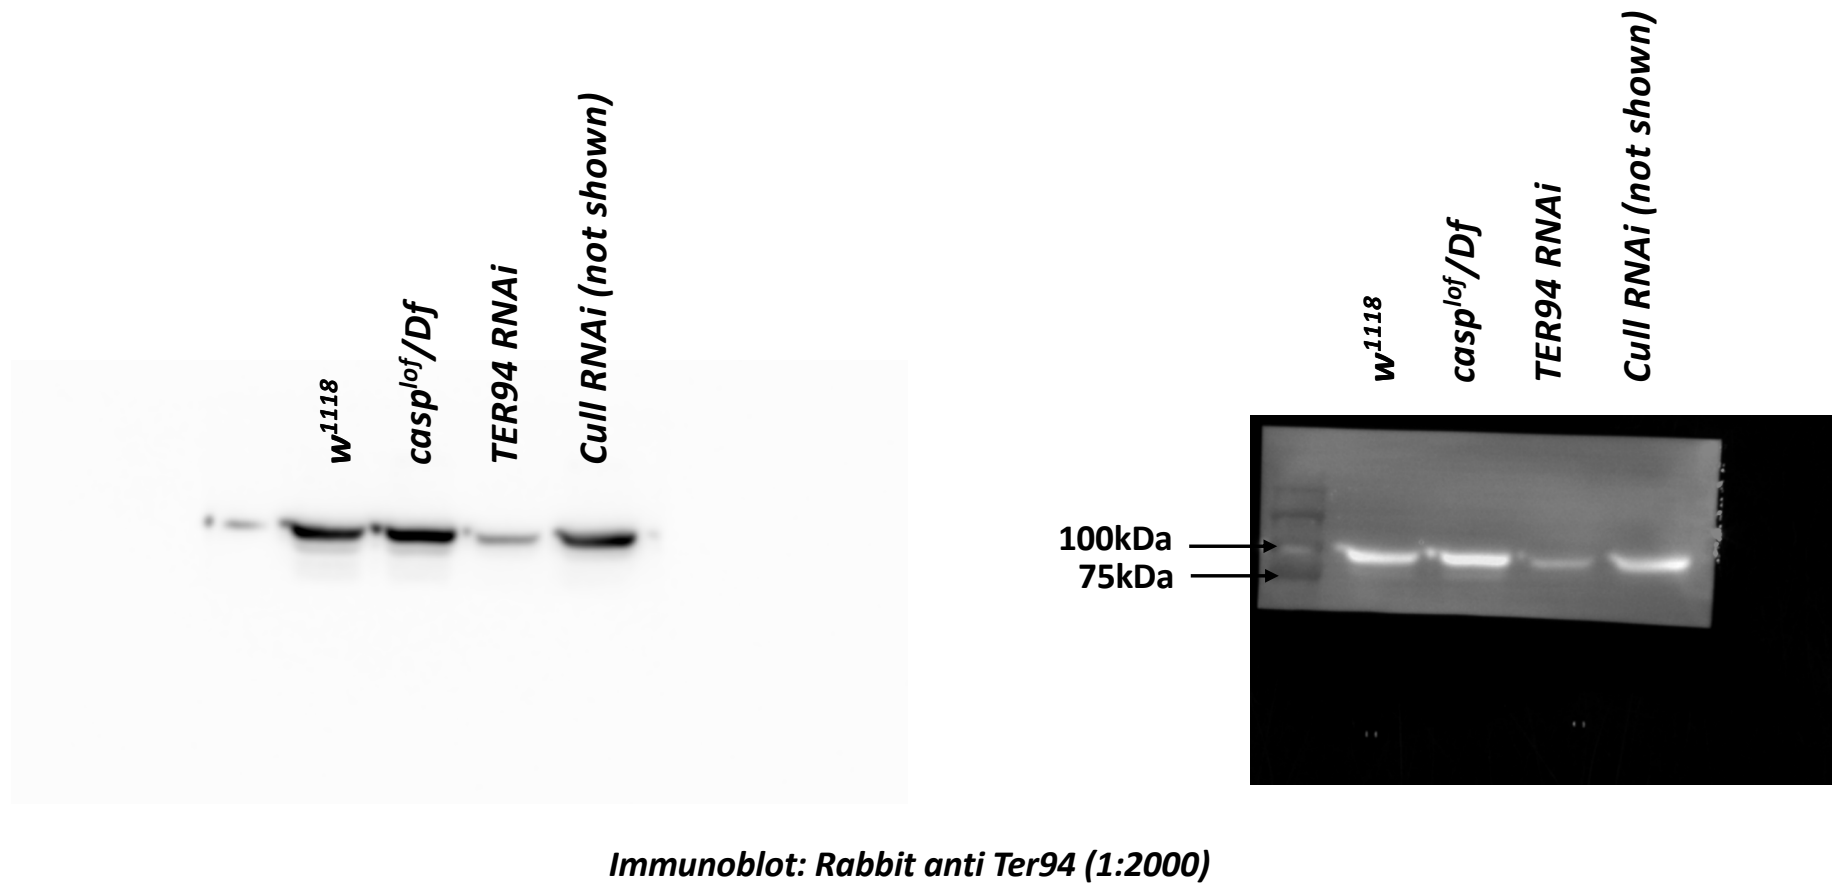

**Figure 4, Source Data 1. Original membranes corresponding to Figure 4, panel B. Blot was probed with rabbit anti-Ter94 antibody.**

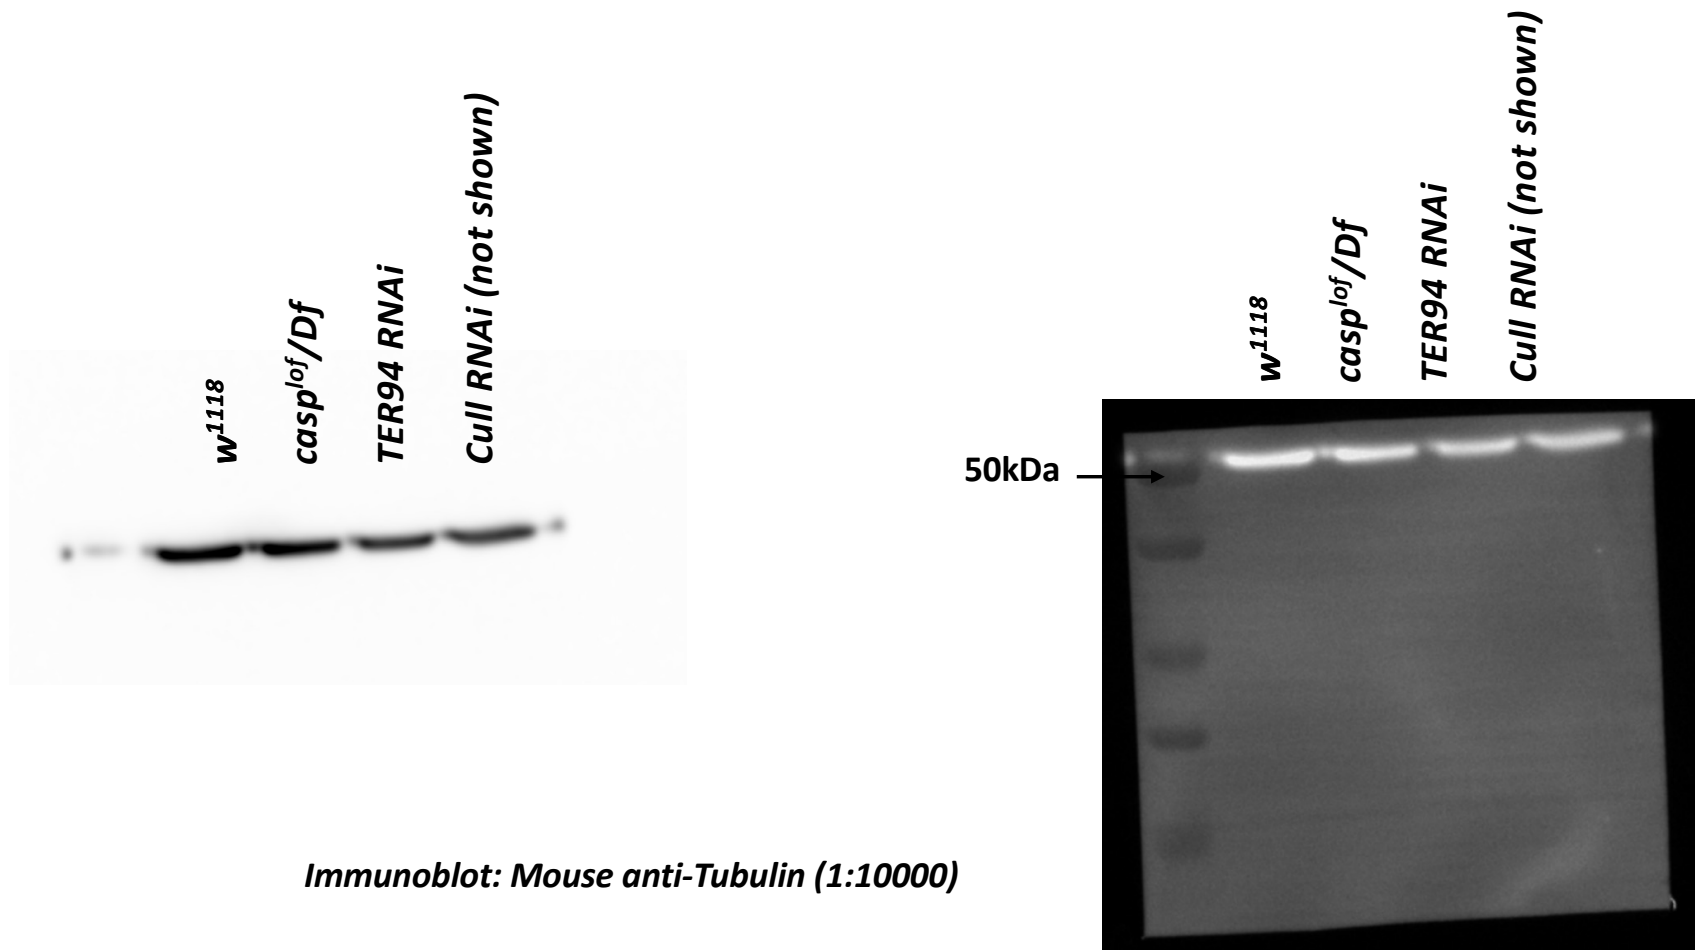

**Figure 4, Source Data 1. Original membranes corresponding to Figure 4, panel B. Blot was probed with Mouse anti-Tubulin antibody.**
