# Supplementary material for: Caspar specifies primordial germ cell count and identity in Drosophila melanogaster
Source: eLife journal article supplement (doi:10.7554/elife.98584), 2024-06-21
Supplement: fig7-data1 [file elife-98584-fig7-data1-v1.pdf]

**w1118**

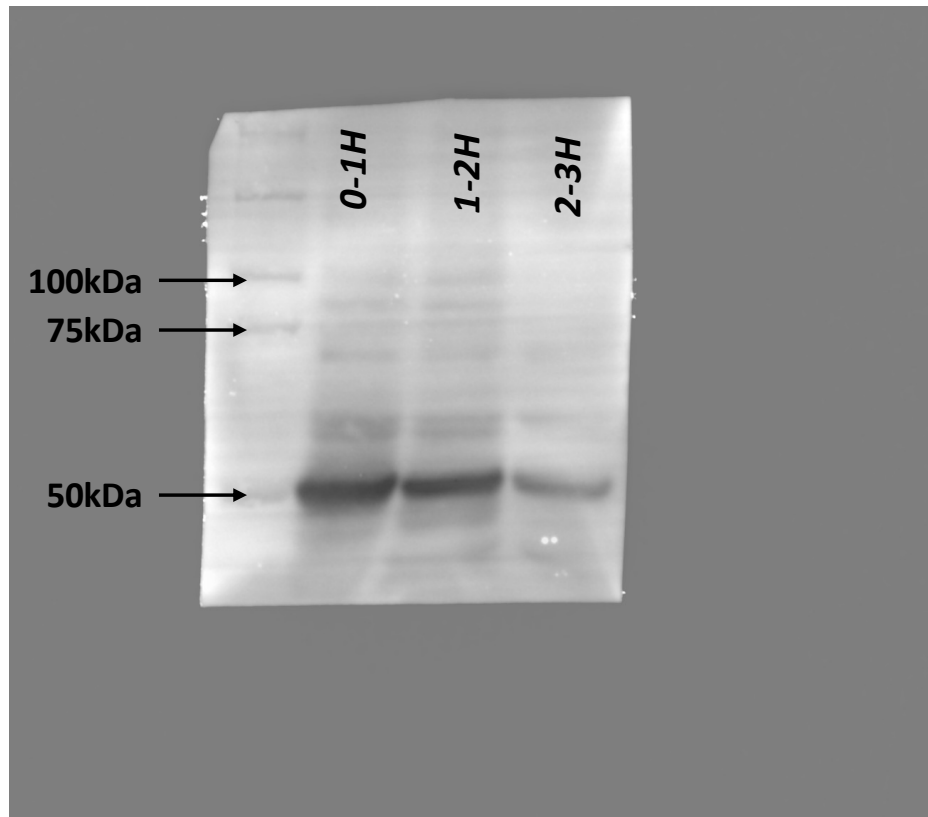

**Casp<sup>lof</sup> / Df**

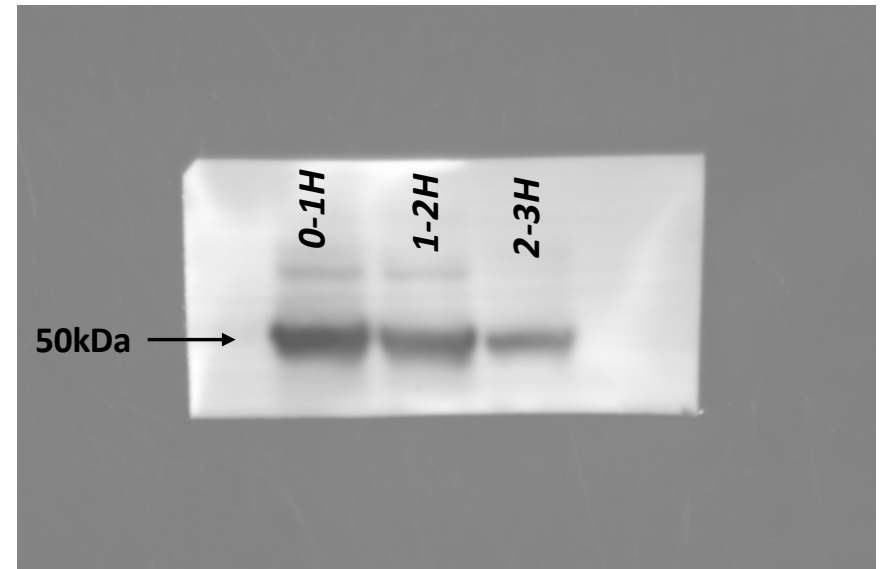

**Immunoblot: Rabbit anti Me31B (1:1000)**

**Figure 7, Source Data 1. Original membranes corresponding to Figure 7, panel A1 and A2. Blot was probed with rabbit anti-Me31B antibody.**

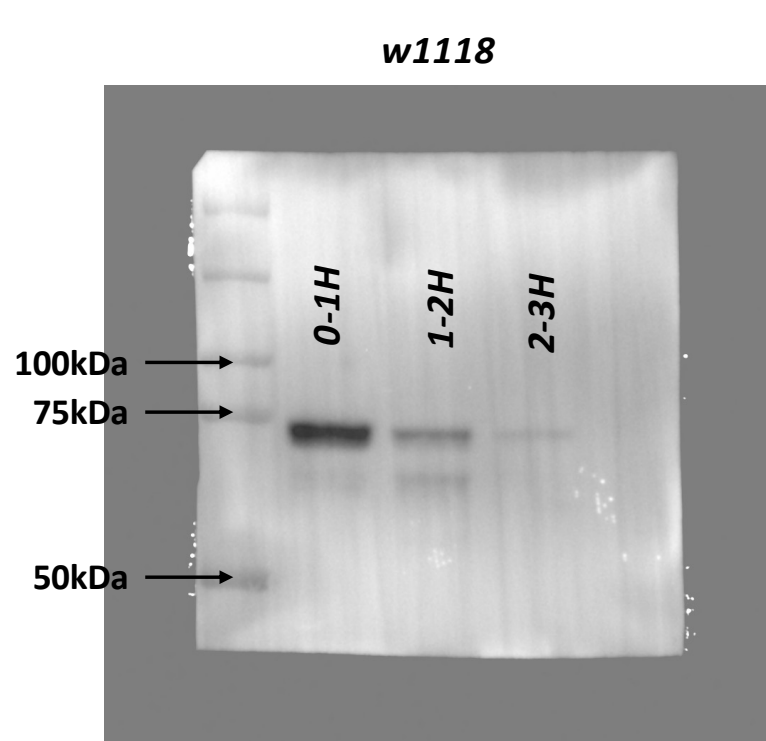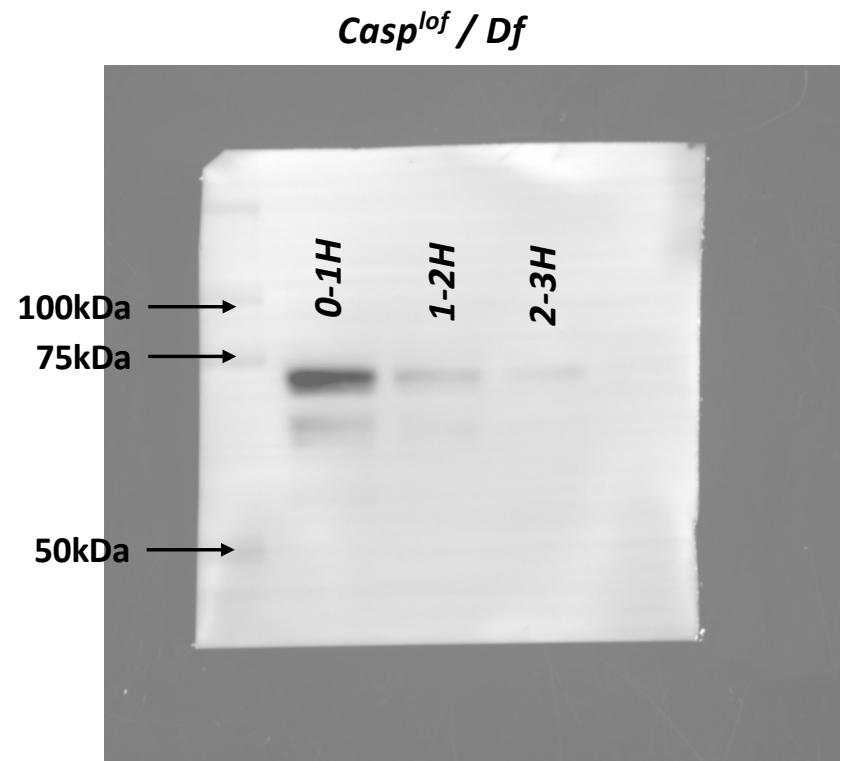

**Immunoblot: Rat anti Tral (1:1000)**

**Figure 7, Source Data 1. Original membranes corresponding to Figure 7, panel B1 and B2. Blot was probed with rat anti-Tral antibody.**

*w1118*

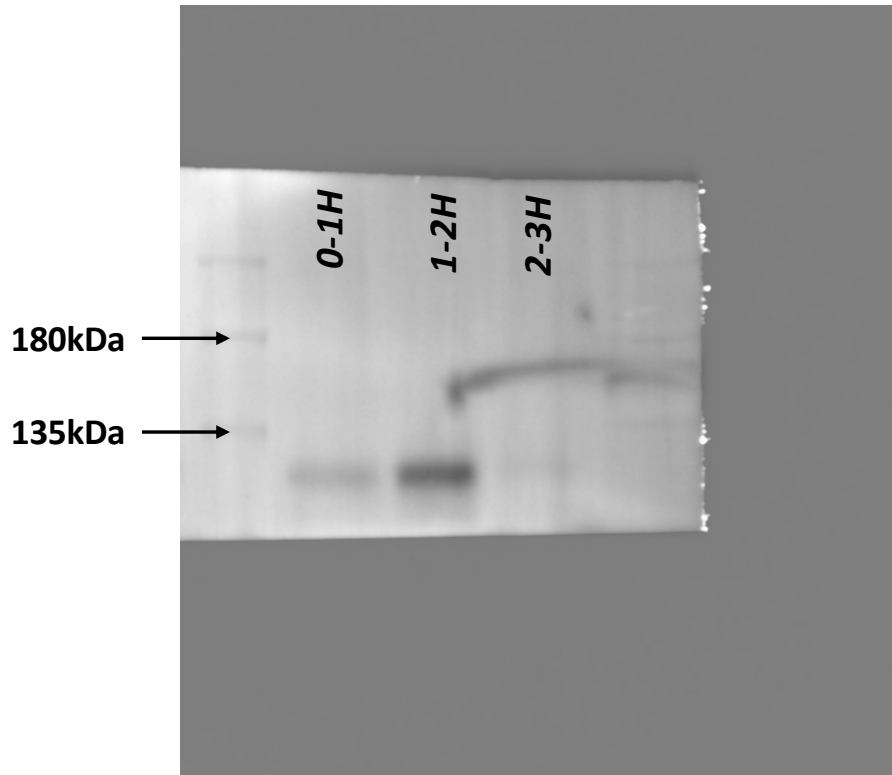

*Casp<sup>lof</sup> / Df*

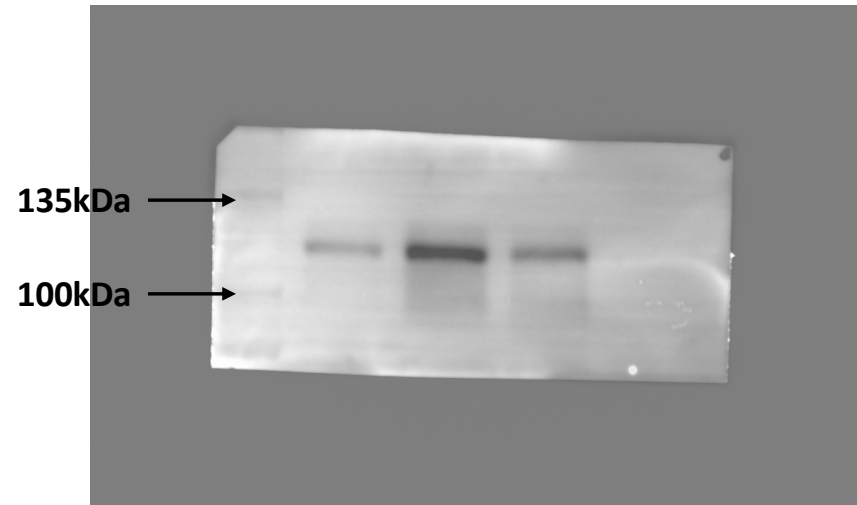

*Immunoblot: Rabbit anti smaug (1:200)*

**Figure 7, Source Data 1. Original membranes corresponding to Figure 7, panel C1 and C2. Blot was probed with rabbit anti-Smaug antibody.**

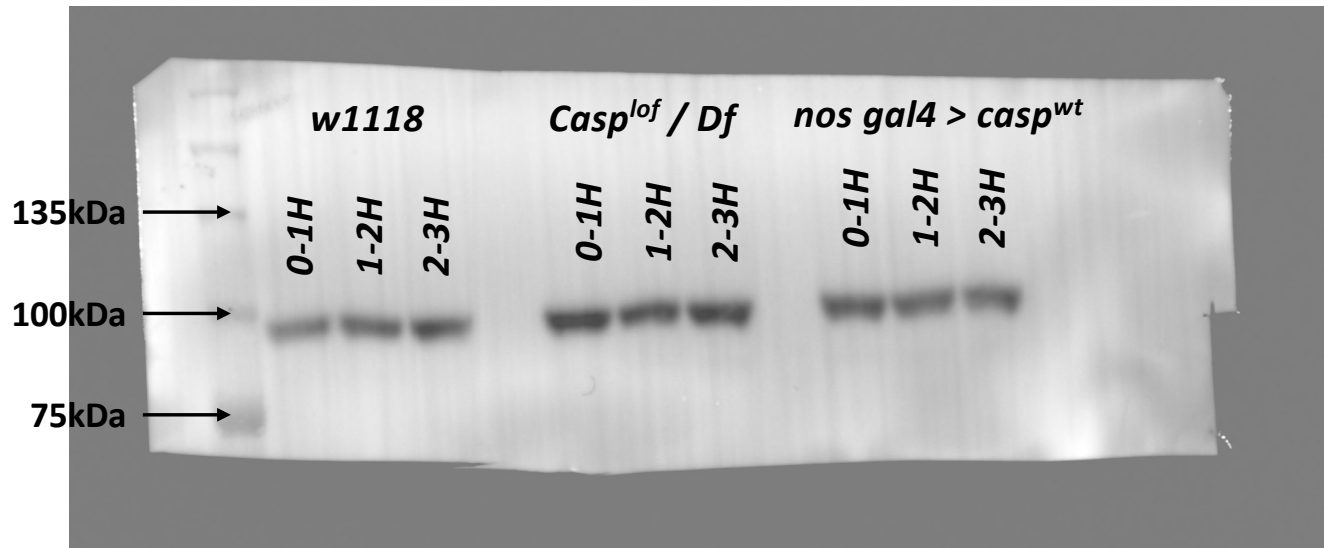

**Immunoblot: Rabbit anti Ter94  
(1:2000)**

**Figure 7, Source Data 1.**  
**Original membranes**  
**corresponding to Figure**  
**7, panel D1 and D2.**  
Blot was probed with  
rabbit anti-Ter94  
antibody. Ter94 levels  
in *nos gal4 > casp<sup>wt</sup>* is  
not shown the paper.

*w1118*

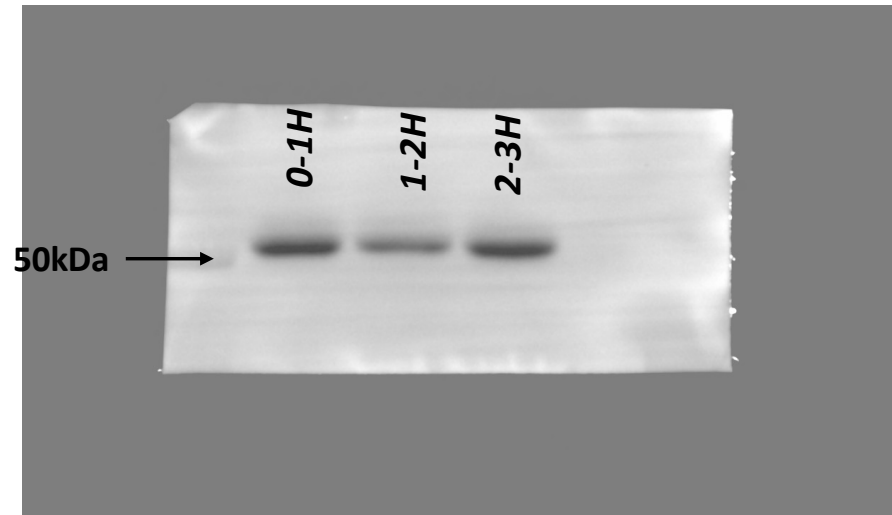

*Casp<sup>lof</sup> / Df*

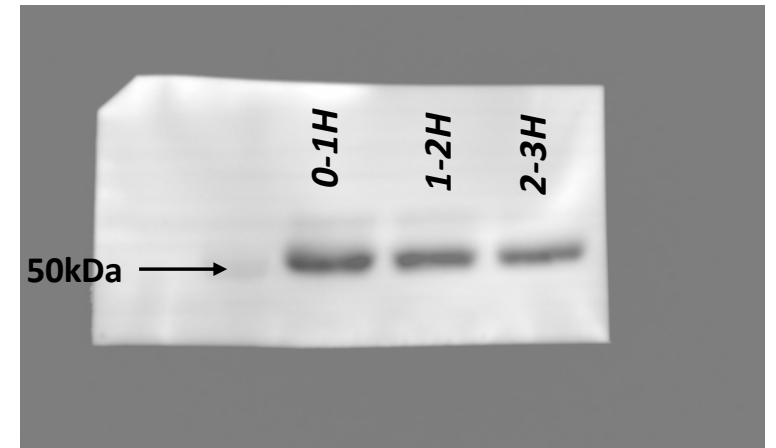

*Immunoblot: Mouse anti Tubulin (1:10,000)*

**Figure 7, Source Data 1. Original membranes corresponding to Figure 7, panel E1 and E2. Blot was probed with mouse anti-Tubulin antibody.**
