# Supplementary material for: Caspar specifies primordial germ cell count and identity in Drosophila melanogaster
Source: eLife journal article supplement (doi:10.7554/elife.98584), 2024-06-21
Supplement: fig9-figsupp1-data1 [file elife-98584-fig9-figsupp1-data1-v1.pdf]

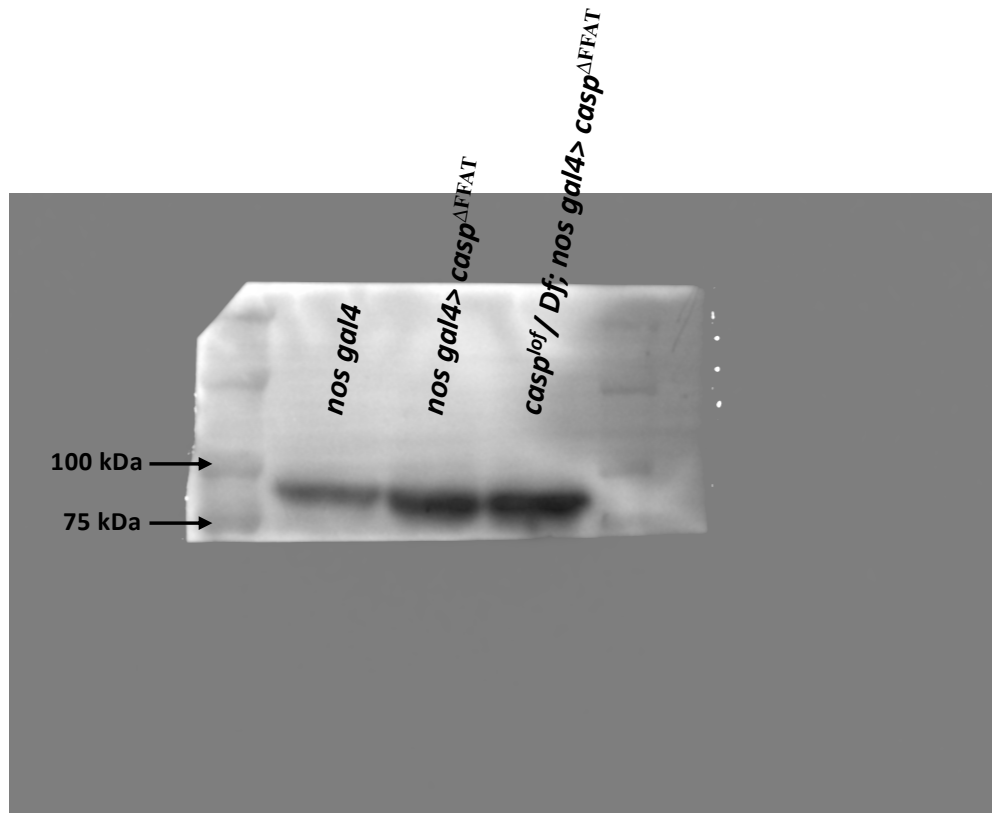

**Immunoblot: Rabbit anti-Caspar  
(1:10,000)**

**Figure 9, Supplementary Source Data 1.** Original membranes corresponding to Figure 9, Supplementary 1 panel C. Blot was probed with rabbit anti-Caspar antibody. Biorad Precision Plus Protein standards (Dual Colour) was used as molecular weight marker

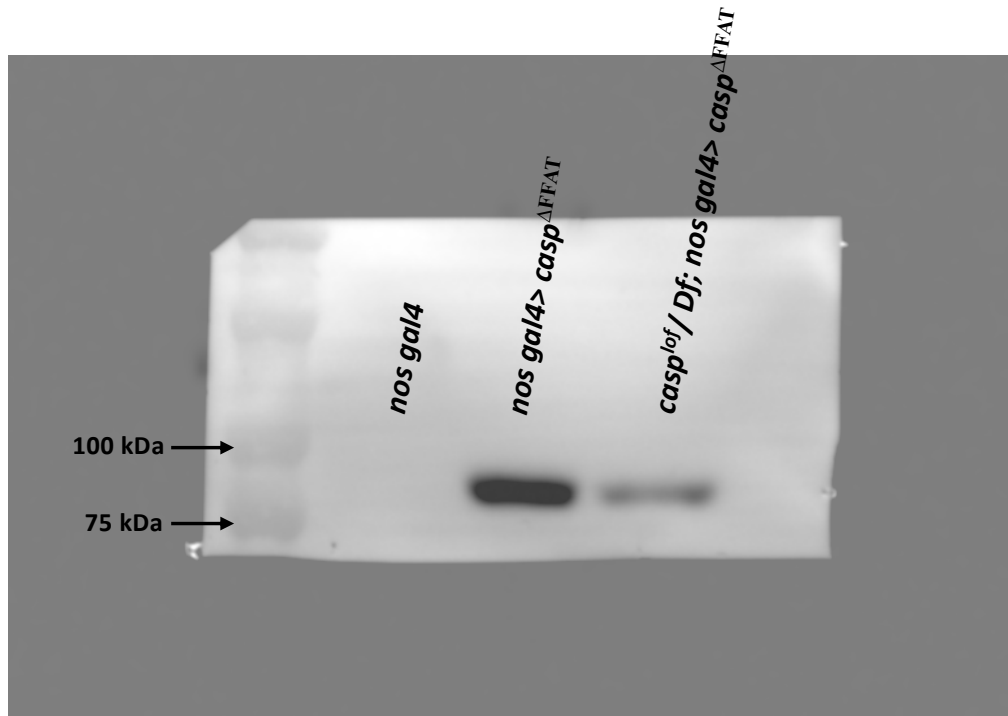

***Immunoblot: Rabbit anti-HA (1:2000)***

**Figure 9, Supplementary Source Data 1.** Original membranes corresponding to Figure 9, Supplementary 1 panel C. Blot was probed with rabbit anti-HA antibody. Biorad Precision Plus Protein standards (Dual Colour) was used as molecular weight marker

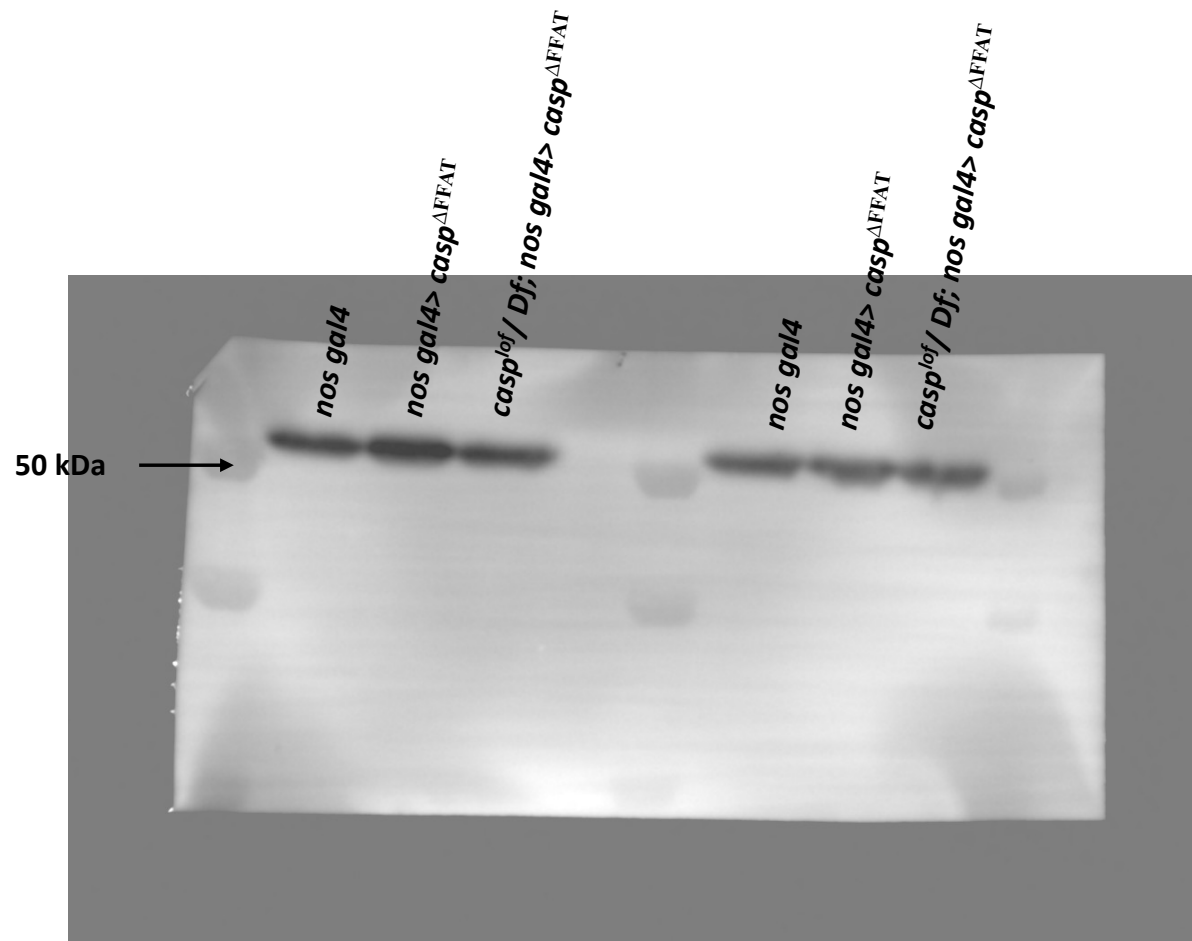

**Immunoblot: Mouse anti-Tubulin (1:10,000)**

**Figure 9, Supplementary Source Data 1.** Original membranes corresponding to Figure 9, Supplementary 1 panel C. Blot was probed with mouse anti-tubulin antibody. Biorad Precision Plus Protein standards (Dual Colour) was used as molecular weight marker
